# Supplementary material for: Fluorinated bottlebrush polymers based on poly(trifluoroethyl methacrylate): synthesis and characterization
Source: Royal Society of Chemistry journal article supplement (doi:10.1039/c5py01514f), 2015-11-25
Supplement: c5py01514f1.pdf [file c5py01514f1.pdf]

**Fluorinated Bottlebrush Polymers Based on Poly(trifluoroethyl methacrylate):  
Synthesis and Characterizations  
Supporting Information**

Yuewen Xu,<sup>\*a</sup> Weiyu Wang,<sup>b</sup> Yangyang Wang,<sup>a</sup> Jiahua Zhu,<sup>a</sup> David Uhrig,<sup>a</sup> Xinyi Lu,<sup>b</sup>  
Jong K. Keum,<sup>a</sup> Jimmy W. Mays,<sup>b</sup> Kunlun Hong<sup>\*a</sup>

<sup>a</sup>Center for Nanophase Materials Sciences, Oak Ridge National Laboratory, Oak Ridge,  
TN 37831, USA

<sup>b</sup>Department of Chemistry, University of Tennessee, Knoxville, TN 37996, USA

**Materials.**

2,2,2-trifluoroethyl methacrylate (Matrix Scientific) was passed through a Al<sub>2</sub>O<sub>3</sub> column and distilled to remove the inhibitor. 5-norbornene-2-ol, mixture of *endo* and *exo* (Sigma-Aldrich), aluminum oxide (neutral, Fluka),  $\alpha$ -bromoisobutyryl bromide (Sigma-Aldrich), cyclohexanone (Sigma-Aldrich), 2,2'-bipyridyl (Sigma-Aldrich), triethylamine (Fisher Scientific), Cl<sub>2</sub>(3-BrPy)<sub>2</sub>(H<sub>2</sub>IMes)RuCHPh (**G3**, Sigma-Aldrich) were used as received. Copper (I) chloride (Sigma-Aldrich) was recrystallized prior to use. HPLC grade THF (Sigma-Aldrich) was dried in a solvent purification system. HPLC grade ethyl acetate (Sigma-Aldrich) was used as received.

### **Additional Instrumentation.**

GI-SAXS/WAXS measurements were carried out on an Anton Paar SAXSess mc<sup>2</sup> equipped with a multipurpose VarioStage. The scattered beam was recorded on an imaging plate (Multisensitive Storage Phosphor) and read using a Perkin Elmer cyclone 2D imaging plate reader. For the GI-SAXS/WAXS measurements, X-ray was generated at 40kV/50 mA and the X-ray beam wavelength was  $\lambda = 1.541 \text{ \AA}$  (Cu K $\alpha$  radiation). The incidence angle for the measurements was  $0.2^\circ$  and the distance between sample and imaging plate was 261 mm.

**Table S1.** Experimental Parameters for Rheology.

| <b>Sample</b>                              | <b><math>T</math> (°C)</b> | <b><math>\gamma_0</math></b> | <b><math>\omega</math> (rad/s)</b> |
|--------------------------------------------|----------------------------|------------------------------|------------------------------------|
| PTFEMA <sub>22</sub>                       | 55 – 80                    | 4% – 0.03%                   | 100 – 0.1                          |
| PNB <sub>21</sub> -g-PTFEMA <sub>22</sub>  | 70 – 120                   | 4% – 0.02%                   | 100 – 0.1                          |
| PNB <sub>49</sub> -g-PTFEMA <sub>22</sub>  | 70 – 120                   | 4% – 0.03%                   | 100 – 0.1                          |
| PNB <sub>200</sub> -g-PTFEMA <sub>22</sub> | 70 – 140                   | 4% – 0.03%                   | 100 – 0.1                          |

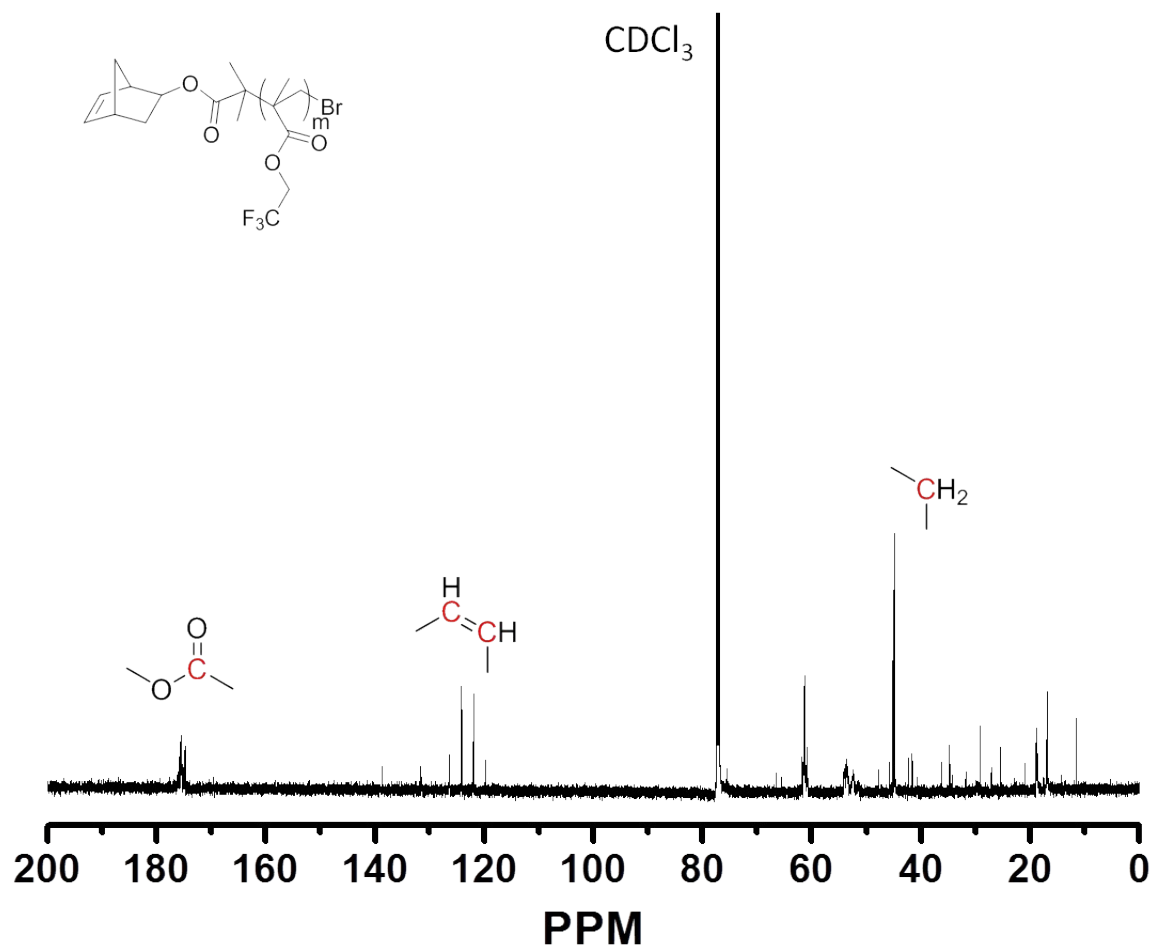

**Figure S1.**  $^{13}\text{C}$  NMR of PTFEMA macromonomer **3**. In  $\text{CDCl}_3$ , 125 MHz.

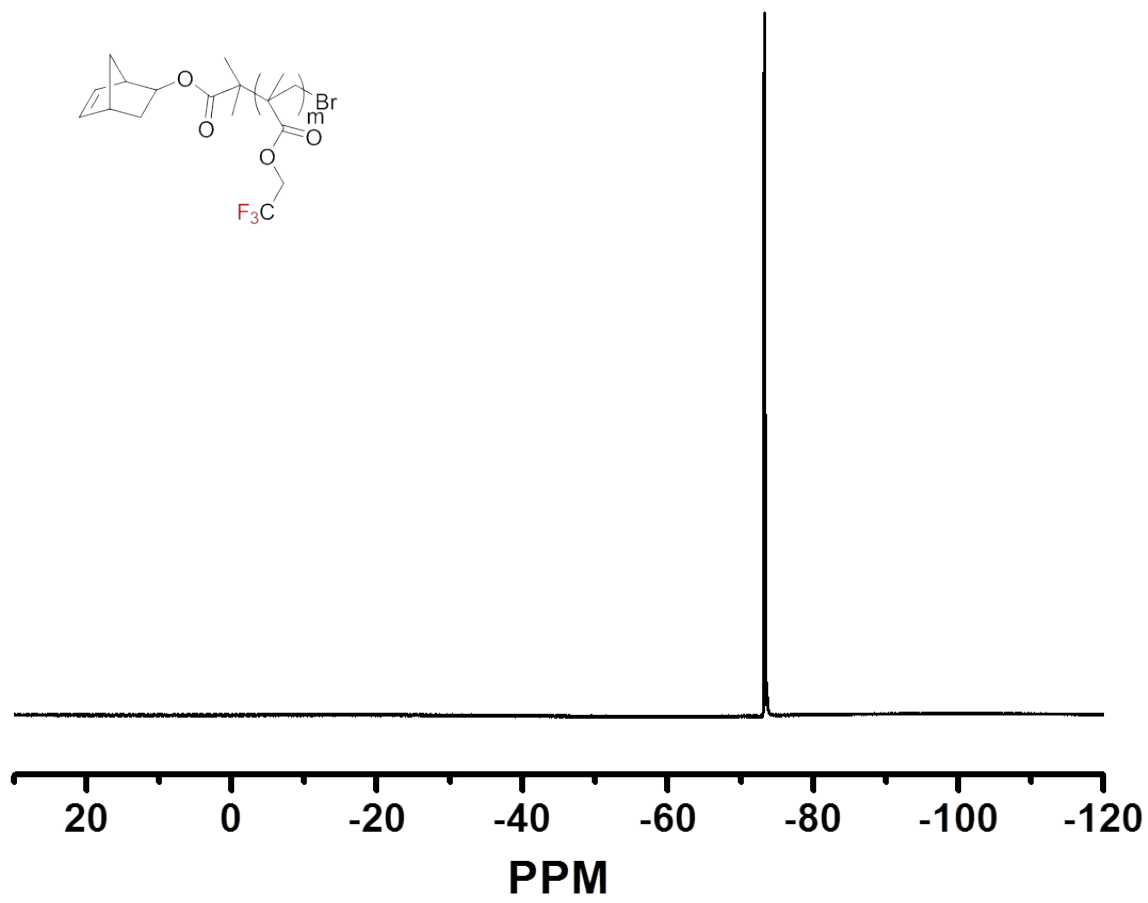

**Figure S2.**  $^{19}\text{F}$  NMR of PTFEMA macromonomer **3**. In  $\text{CDCl}_3$ , 470 MHz.

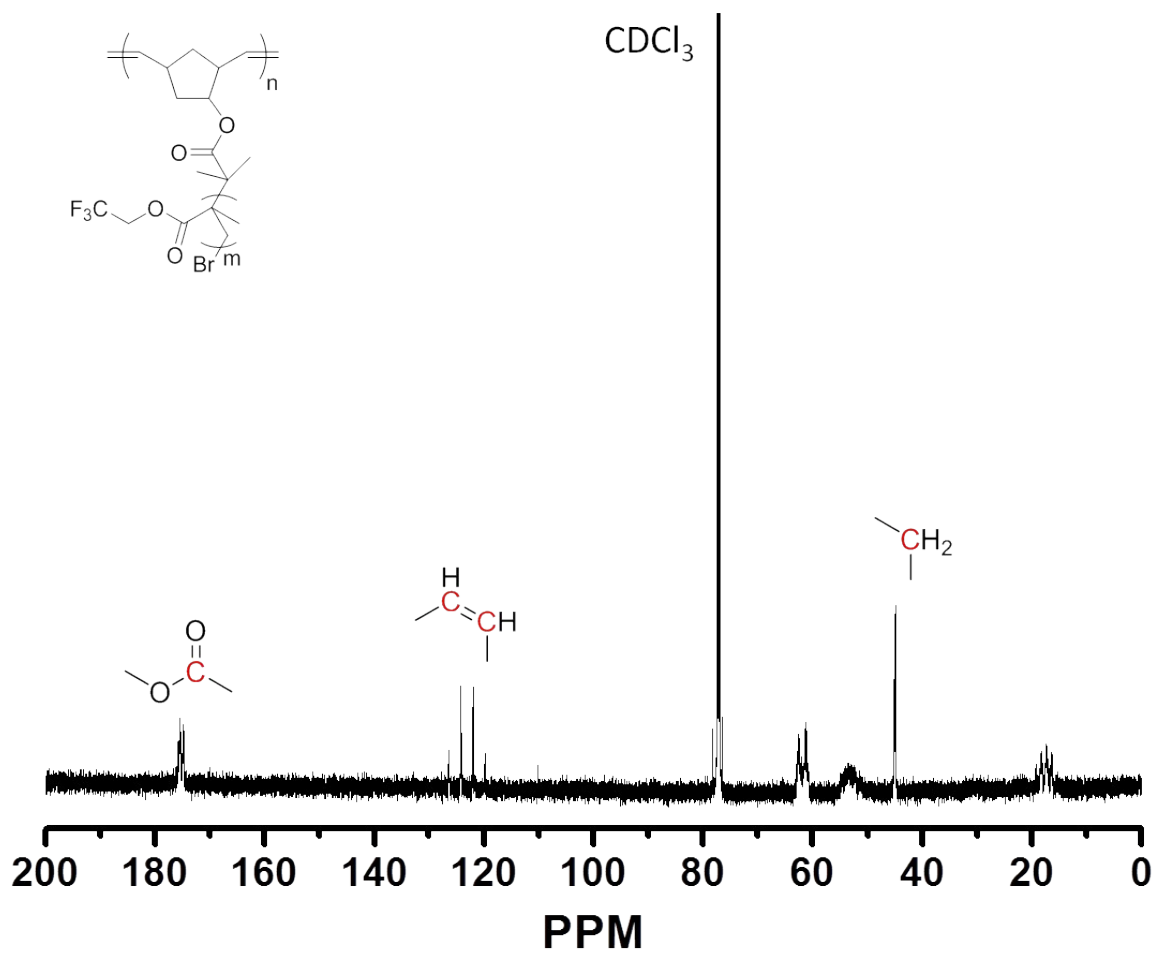

**Figure S3.**  $^{13}\text{C}$  NMR of PNB-g-PTFEMA bottlebrush polymer 4. In  $\text{CDCl}_3$ , 125 MHz.

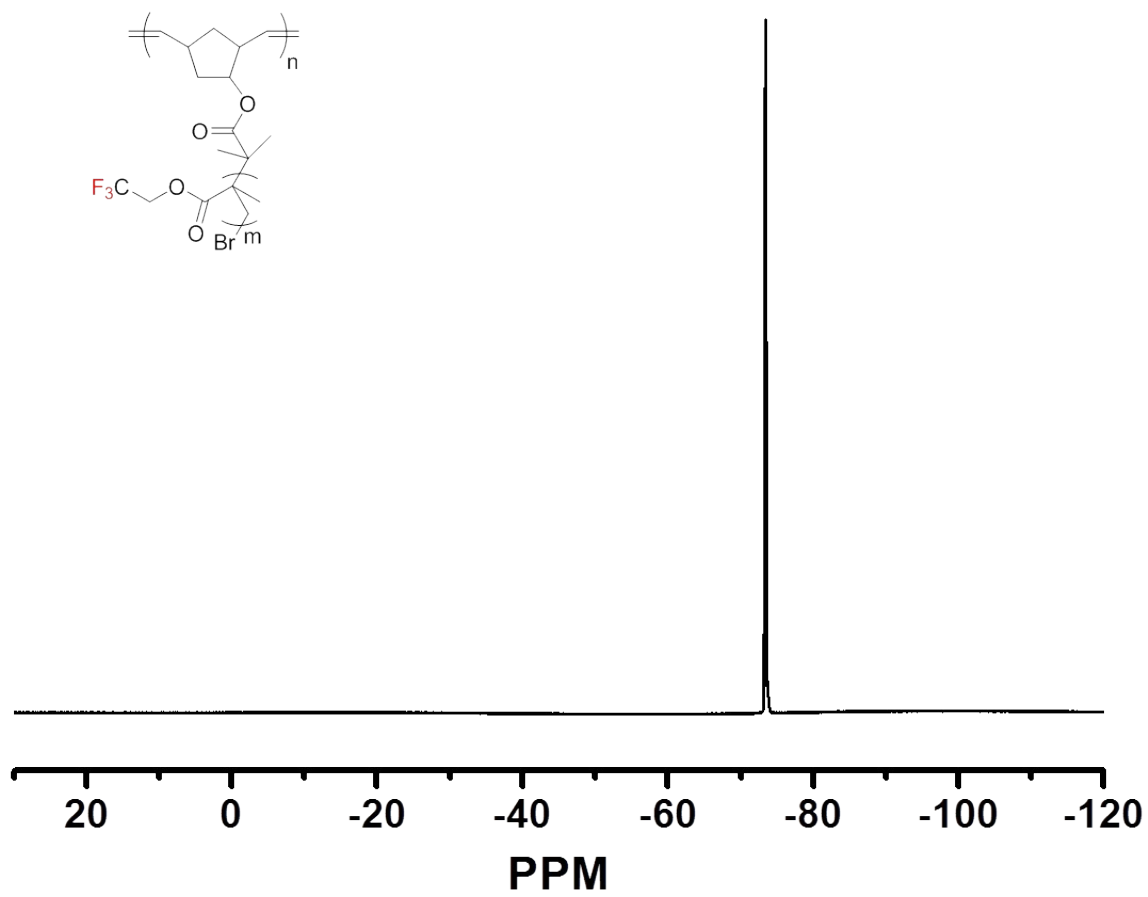

**Figure S4.**  $^{19}\text{F}$  NMR of PNB-g-PTFEMA bottlebrush polymer 4. In  $\text{CDCl}_3$ , 470 MHz.

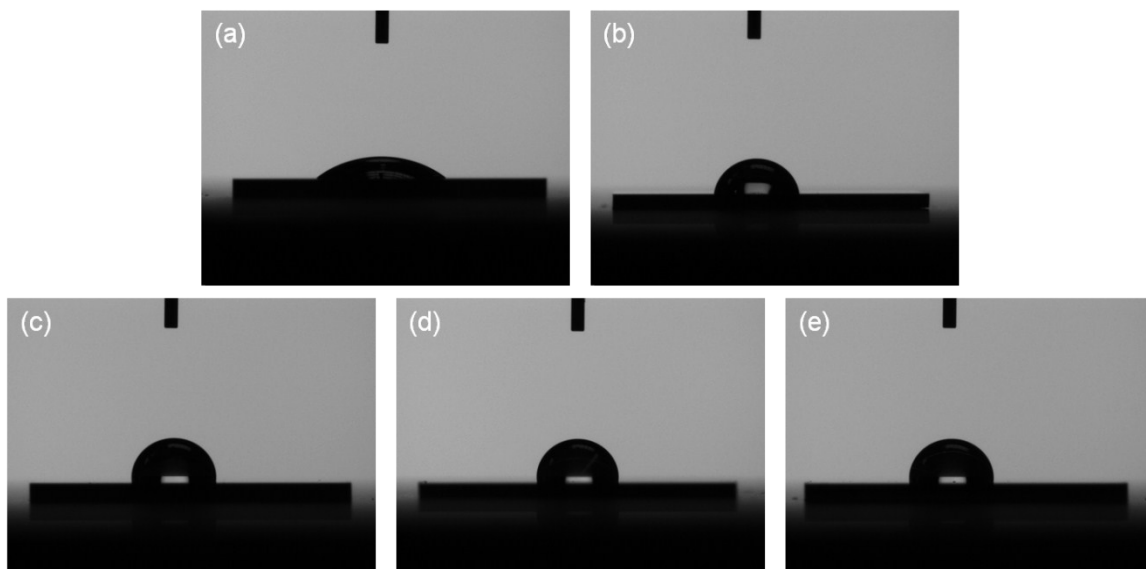

**Figure S5.** Static water contact angle (a) on pure silicon wafer; (b) PTFEMA macromonomer **3**; (c) PNB<sub>21</sub>-g-TFEMA<sub>22</sub> bottlebrush polymer; (d) PNB<sub>49</sub>-g-TFEMA<sub>22</sub> bottlebrush polymer; (e) PNB<sub>200</sub>-g-TFEMA<sub>22</sub> bottlebrush polymer.

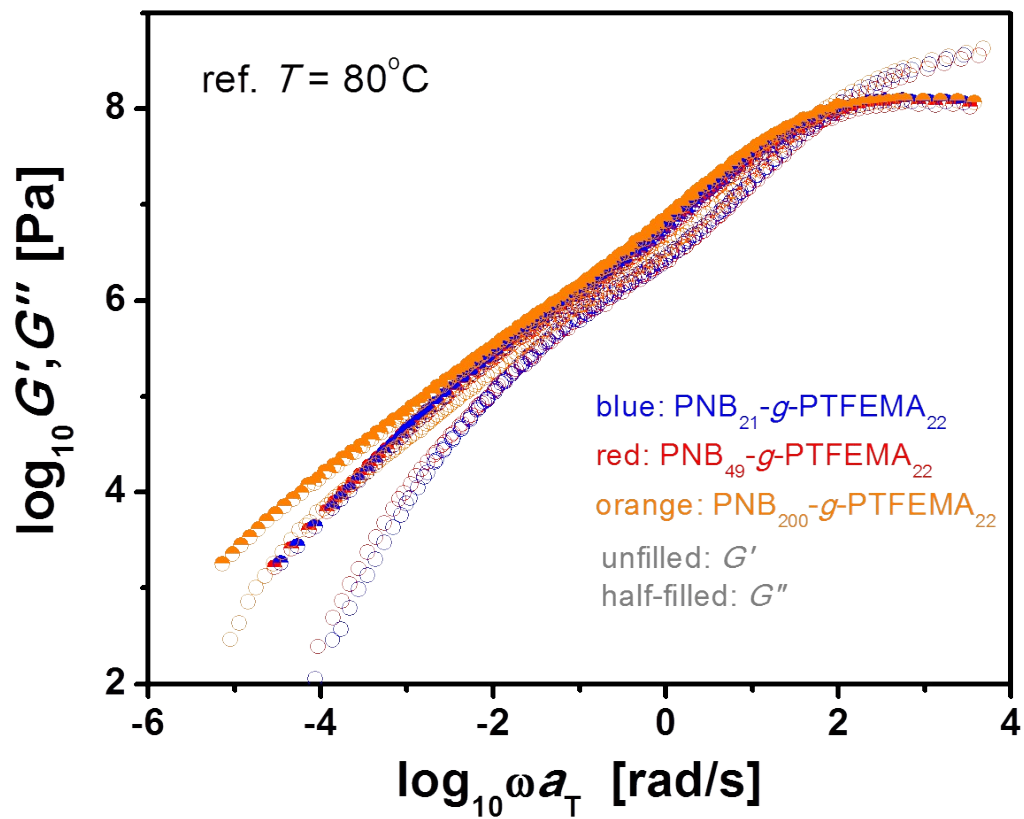

**Figure S6.** Linear viscoelastic spectra of the bottlebrush polymer  $\text{PNB}_{21}\text{-}g\text{-PTFEMA}_{22}$  (blue),  $\text{PNB}_{49}\text{-}g\text{-PTFEMA}_{22}$  (red), and  $\text{PNB}_{200}\text{-}g\text{-PTFEMA}_{22}$  (orange).



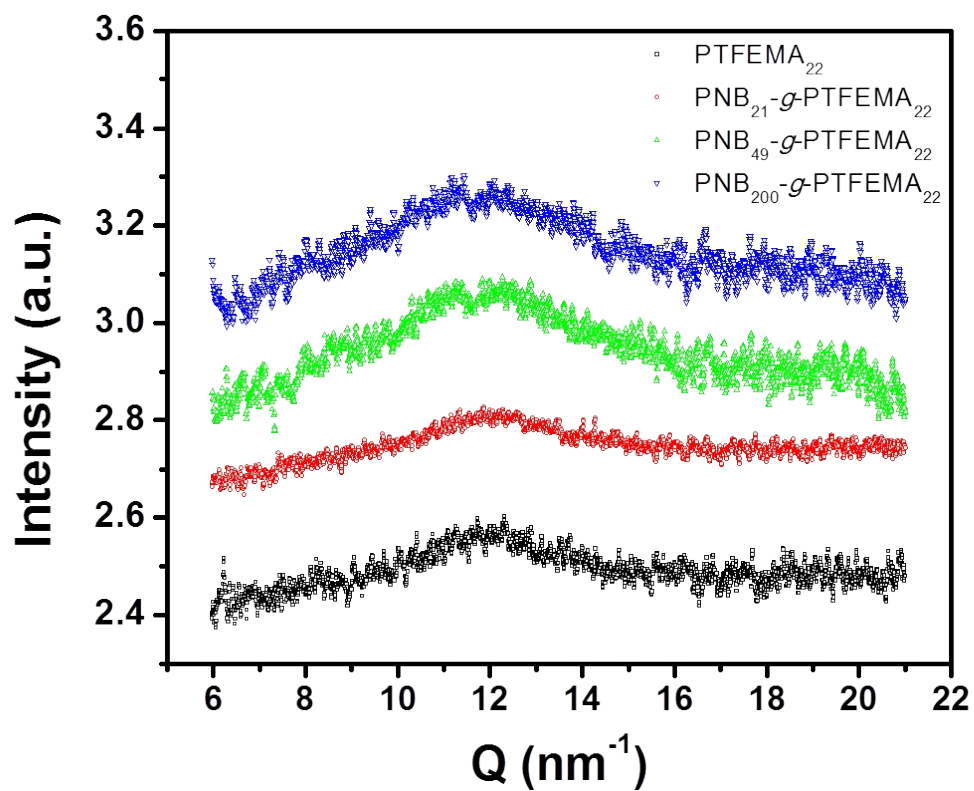

**Figure S7.** GI-WAXS for polymer thin films. All samples show broad peak at  $Q = \sim 12 \text{ nm}^{-1}$  implying amorphous structure without crystalline order. The spacing of  $L = 0.5 \text{ nm}$  corresponds to short distance correlation on the PTFEMA side chains.<sup>1</sup>

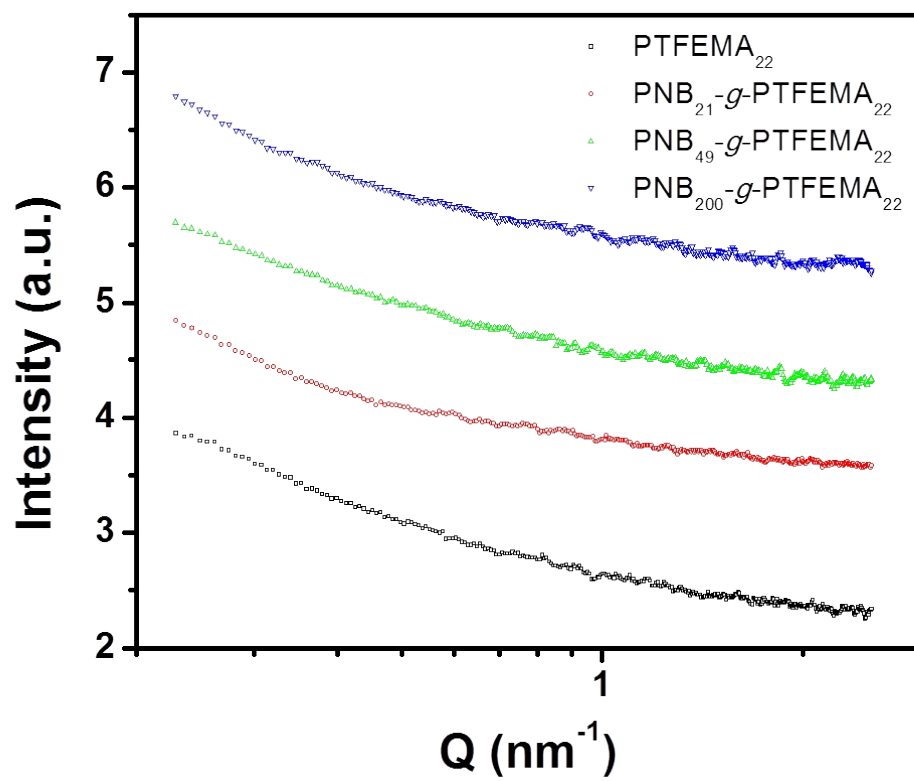

Figure S8. GI-SAXS for polymer thin films.

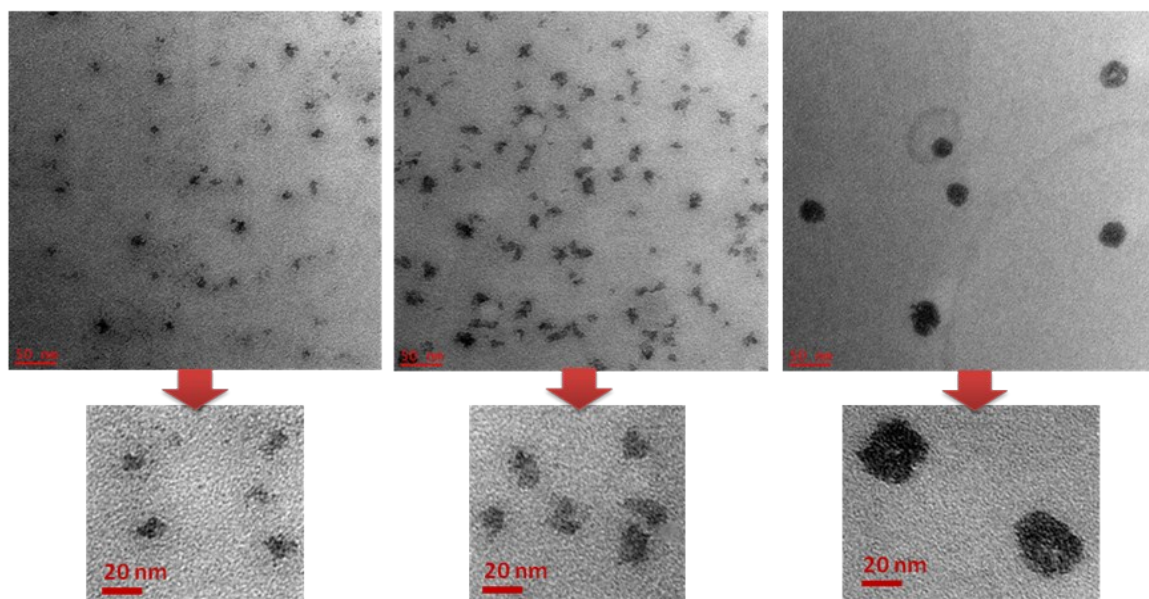

**Figure S9.** TEM images of three bottlebrush polymers at low and high magnifications. PNB<sub>22</sub>-g-PTFEMA<sub>22</sub> (left); PNB<sub>49</sub>-g-PTFEMA<sub>22</sub> (middle); PNB<sub>200</sub>-g-PTFEMA<sub>22</sub> (right).

## Reference

- 1 C. Grigoriadis, A. Nese, K. Matyjaszewski, T. Pakula, H. -J. Butt, G. Floudas, *Macromol. Chem. Phys.* 2012, **213**, 1311–1320.
